# Supplementary material for: The Effect COVID Has Had on the Wants and Needs of Children in Terms of Play: Text Mining the Qualitative Response of the Happen Primary School Survey with 20,000 Children in Wales, UK between 2016 and 2021
Source: Int J Environ Res Public Health. 2022 Oct 4;19(19):12687. doi: 10.3390/ijerph191912687 (PMC9566363; doi:10.3390/ijerph191912687)
Supplement: Supplementary file 1 [file ijerph-19-12687-s001.zip › S2.pdf]

**Supplementary file S2 (S2): Table S1**

| <b>Time To Play</b>                                                                                                                                                                                                                                                                                                                                                                                                                                                                                                                                                                                                                                                                                                                                                                                                                                                                                                                                                                                                                                                                                                                                                                                                                                                                                                                                                                                                                                                                                                                                                                                                                                                                                                                                                                                                                                                           |
|-------------------------------------------------------------------------------------------------------------------------------------------------------------------------------------------------------------------------------------------------------------------------------------------------------------------------------------------------------------------------------------------------------------------------------------------------------------------------------------------------------------------------------------------------------------------------------------------------------------------------------------------------------------------------------------------------------------------------------------------------------------------------------------------------------------------------------------------------------------------------------------------------------------------------------------------------------------------------------------------------------------------------------------------------------------------------------------------------------------------------------------------------------------------------------------------------------------------------------------------------------------------------------------------------------------------------------------------------------------------------------------------------------------------------------------------------------------------------------------------------------------------------------------------------------------------------------------------------------------------------------------------------------------------------------------------------------------------------------------------------------------------------------------------------------------------------------------------------------------------------------|
| <ul style="list-style-type: none"> <li>• <i>"Spending more time swimming and going outside" (2016/2017)</i></li> <li>• <i>"Everyone spends the time that they play devises to go for a walk at least" (2017/2018)</i></li> <li>• <i>"We should spend less time on our phones." (2017/2018)</i></li> <li>• <i>"Improve the park facilities so we can keep fit and have fun in our own time" (2017/2018)</i></li> <li>• <i>"Have more time to do sports" (2018/2019)</i></li> <li>• <i>"To have more clubs at lunch time break" (2018/2019)</i></li> <li>• <i>"I would probably change how much extra work we do after school so we can spend more time together." (2018/2019)</i></li> <li>• <i>"Not just boy sports at play times so girls can play aswell." (2018/2019)</i></li> <li>• <i>"Go spend time outside of the house" (2019/2020)</i></li> <li>• <i>"Allowed to play out all the time because we like playing out" (2019/2020)</i></li> <li>• <i>"More time to play" (2019/2020)</i></li> <li>• <i>"Less time on our electronics" (2019/2020)</i></li> <li>• <i>"I didn't have to homework because not being in schools is supposed to be my free time, doing school work at home i think is silly." (2019/2020)</i></li> <li>• <i>"More play time" (2020/2021)</i></li> <li>• <i>"To have time to have time to talk outside during lessons" (2020/2021)</i></li> <li>• <i>"Some more time to play at play centres and similer things like that." (2020/2021)</i></li> <li>• <i>"The amount of time i get to play with my friends" (2020/2021)</i></li> <li>• <i>"Afternoon play time" (2020/2021)</i></li> <li>• <i>"To have more time to play" (2021/2022)</i></li> <li>• <i>"Limit tv and time on devices." (2021/2022)</i></li> <li>• <i>"A limit of screen time and more fresh air" (2021/2022)</i></li> <li>• <i>"More breaktimes" (2021/2022)</i></li> </ul> |
| <b>Space To Play (including access, safety and sustainability concerns in play spaces)</b>                                                                                                                                                                                                                                                                                                                                                                                                                                                                                                                                                                                                                                                                                                                                                                                                                                                                                                                                                                                                                                                                                                                                                                                                                                                                                                                                                                                                                                                                                                                                                                                                                                                                                                                                                                                    |
| <ul style="list-style-type: none"> <li>• <i>"We could get a park nearer to our house." (2016/2017)</i></li> <li>• <i>"To have a pavement running from [A] to [B]" (2016/2017)</i></li> <li>• <i>"To move the busy road by my house" (2016/2017)</i></li> <li>• <i>"Litter and dog poo and speeding" (2016/2017)</i></li> <li>• <i>"More rubbish bins and less cars" (2016/2017)</i></li> <li>• <i>"Less rubbish and shattered glass" (2016/2017)</i></li> <li>• <i>"Have a park built" (2017/2018)</i></li> </ul>                                                                                                                                                                                                                                                                                                                                                                                                                                                                                                                                                                                                                                                                                                                                                                                                                                                                                                                                                                                                                                                                                                                                                                                                                                                                                                                                                             |

- *"More parks for people to run or walk around in instead of just staying inside on their devices" (2017/2018)*
- *"Get a little park in the local area where people could walk to or cycle to or scoot to so a lot of people (children or kids) could make friends and could hang out" (2017/2018)*
- *"People could start picking up their rubbish and put in the bin" (2017/2018)*
- *"Have a litter pick up once a week, raise more money for charity's, clean up dog poop after the dog poop's, build homes for hedgehogs and other animals, rent a big boat and go into the middle of the ocean and have a big litter pick for a week." (2017/2018)*
- *"Put more bins so that there is less litter." (2017/2018)*
- *"Longer breaks and be calmer and nicer with us" (2018/2019)*
- *"Get involved in more outdoor activities" (2018/2019)*
- *"To help school have better sporting facilities." (2018/2019)*
- *"There are unfriendly people hanging around my area doing drugs and smoking" (2018/2019)*
- *"Make sure that parks and other places have safe equipment" (2018/2019)*
- *"Play on the grass more in the summer" (2019/2020)*
- *"Make the park safer from unkind boys" (2019/2020)*
- *"More space to play outside" (2020/2021)*
- *"Make the yard bigger" (2020/2021)*
- *"I would like for new gates where the parking lot is and some fences where the cars can go to the parking lot so it's more safer and people won't worry" (2020/2021)*
- *"Easier to access outdoor places" (2021/2022)*
- *"Bigger park" (2021/2022)*
- *"A bigger Garden." (2021/2022)*
- *"More safer and clean areas for children to play and feel more comfortable!" (2021/2022)*

#### **Permission to Play (including relationships)**

- *"More friends to live by my house" (2016/2017)*
- *"Stop bullies" (2016/2017)*
- *"Do more sport with my mum" (2016/2017)*
- *"People not smoking as much and less fighting between people." (2017/2018)*
- *"Be very kind" (2017/2018)*
- *"Friends living more near" (2017/2018)*
- *"Stop fighting" (2018/2019)*
- *"Mum and dad to live with each other" (2018/2019)*
- *"My friends aka 1 or 2 people" (2018/2019)*
- *"Stop bullying" (2019/2020)*

- *"To have less arguments" (2019/2020)*
- *"Being around friends more" (2019/2020)*
- *"Going out with my friends" (2020/2021)*
- *"Not getting along" (2020/2021)*
- *"Maybe my some of my friends could be a bit nicer/kinder" (2020/2021)*
- *"Longer breaks and be calmer and nicer with us" (2020/2021)*
- *"Be kind to people and make others to be kind to others" (2021/2022)*
- *"Stop bullying around the world" (2021/2022)*
- *"To have my mum not be so busy" (2021/2022)*

### **Specific Activity Recommendations**

- *"Add somewhere like a field or playground nearer to where people live so little children or even us can exercise as some children cant go that far. everyone should have fun exercising." (2016/2017)*
- *"Go swimming more" (2016/2017)*
- *"Swimming" (2016/2017)*
- *"Bike track" (2017/2018)*
- *"An all sports club"(2017/2018)*
- *"Having more exercise units such as football grounds." (2017/2018)*
- *"Play more games" (2018/2019)*
- *"I will change do more sports" (2018/2019)*
- *"More sport clubs" (2019/2020)*
- *"More PE" (2019/2020)*
- *"Swings in the park, better football pitch, somewhere to play basketball" (2019/2020)*
- *"More activities to do outside." (2020/2021)*
- *"Better playing equipment in the park for older children" (2020/2021)*
- *"To run with my friends more and play different activities." (2020/2021)*
- *"More football and breaks" (2021/2022)*
- *"More after school sports" (2021/2022)*
- *"More gym and physical activity" (2021/2022)*

### **Health and Wellbeing Outcomes**

- *"Eat more fruit" (2018/2019)*
- *"To bring healthy snacks to school at first playtime." (2018/2019)*
- *"Sometimes bring around healthy fruit and veg" (2018/2019)*
- *"More fruit and veg" (2019/2020)*

- *"Learning things that are most important to the world and events" (2019/2020)*
- *"Keep fit always get fresh air" (2020/2021)*
- *"I think we should have things to play with and we need more fruits around us." (2020/2021)*
- *"To Do More Exercise" (2020/2021)*
- *"Try to cut down on sugar." (2021/2022)*
- *"If school did heifer diners" (2021/2022)*
- *"Have healthy food for healthy eating and more activities for plays" (2021/2022)*

#### **The Impact of Covid**

- *"i would change covid-19 so me and my friends can meet outside of school" (2019/2020)*
- *"Covid not being here" (2019/2020)*
- *"NO covid rules." (2019/2020)*
- *"Try and stop covid from spreading everywhere" (2021/2022)*
- *"Stop coronavirus and be able to be with people in parties more often." (2021/2022)*
- *"Get rid of COVID rules" (2021/2022)*
- *"seeing each other a lot more but because of covid we have not been doing that" (2021/2022)*
- *"Easier interaction not staying away from each other (covid)" (2021/2022)*
